# Supplementary material
Source: Royal Society of Chemistry journal article supplement (doi:10.1039/d5va00484e)
Supplement: d5va00484e2.pdf [file d5va00484e2.pdf]

### Percent Plastic Polymer Screening Methodology

We define plastic polymers as organic or partially-organic polymeric materials (exclusive of additives), excluding unmodified natural polymers.<sup>1</sup> This definition includes all thermoplastics, thermosets, and elastomers (including rubber and silicone). It includes polymers if they are synthetic (polymerized from either petrochemical or biobased monomers), or semisynthetic (natural polymers such as cellulose and natural rubber that are chemically modified, such as rayon), but does not include naturally occurring polymers (e.g., cellulose, cotton, natural rubber).<sup>2</sup>

We queried all Common Products in Pharos, omitting seven Common Products that capture content of post-consumer recycled materials, not finished products. In the remaining Common Products (N=239) we identified 716 unique chemicals or substances as identified by their Chemical Abstracts Service Registry Number (CASRN) or, for materials without a CASRN, by their unique material identification number from the Pharos database. We created a decision tree (Figure S1) and screened for substances meeting the definition of plastic polymer above using R version 4.5.0.<sup>3</sup> We first identified CASRNs from Common Products that appeared on the Canadian Environmental Protection Act 1999 (CEPA) Domestic Substances List (DSL). We then classified content as a plastic polymer if its substance category was “polymer” or unknown or variable composition, complex reaction products or biological materials (UVCBs) classified as “UVCBs-polymer.”<sup>4,5</sup> We used the CEPA DSL because it is an authoritative list containing over 22,000 chemicals and it characterizes over 4,000 of these substances in one of these two polymer categories.

Substances on the CEPA DSL that were not in either of these two categories were not identified as plastic polymers, unless the substance name indicated that it was a silicone polymer (Table S3a). The CEPA DSL classifies silicone polymers as UVCBs-organic. Since silicones meet the definition of plastic polymer described above, any silicones identified in the CEPA DSL were identified as plastic polymers. We screened all remaining substances identified in Common Products that were not listed or had no classification in the CEPA DSL using the process and search terms shown in Table S3b. We reviewed the results and found two CASRNs that were identified in the CEPA DSL as UVCBs polymers, which were inorganic salts. Since these two salts did not meet the definition of plastic polymer above, we hard-coded these as exceptions in the R script, so they would not be flagged as plastic polymers.

We also screened Common Products for chemicals that react to form polyurethane, epoxy, or acrylic polymers (common reactive polymer chemistry in building products) when applied. We first identified products containing chemicals that combine with other reactants in the product, gases in air, or added water (Table S4). We screened the substances in these products against an additional series of search terms to identify substance names suggesting the presence of plastic polymer precursors (Table S3c).

We determined the total percent weight of plastic polymers in each Common Product by summing the percent weight of all substances flagged as plastic polymers or plastic polymer precursors.

We also screened substance names using a series of regular expressions to identify the percent weight of the specific polymers in each product (Table S5). The resulting data set (Table S1) includes the total percent weight plastic polymers and polymer types for each product. Substances that did not have a plastic polymer type captured by these regular expressions were reviewed and manually assigned a plastic polymer type. A number of substances were present in small quantities or their names suggested chemistries that did not allow them to be readily categorized in one of the plastic polymer categories already included in the analysis. These substances were designated “other” and their chemical name, CASRN, and percent weight are included in Table S1 under the heading ‘Chemical Identities of Plastic Polymer Types Designated as "Other"’.

### References:

- 1 Directive (EU) 2019/904 of the European Parliament and of the Council of 5 June 2019 on the Reduction of the Impact of Certain Plastic Products on the Environment. *Off. J. Eur. Union* 2019, **155** (12.6.2019), 1–19.
- 2 L. Trasande, R. Krithivasan, K. Park, V. Obsekov and M. Belliveau, *J. Endocr. Soc.*, DOI: 10.1210/jendso/bvad163.
- 3 R Core Team, R: A Language and Environment for Statistical Computing (version 4.3.1), R Foundation for Statistical Computing, Vienna, Austria, 2023.
- 4 Environment and Climate Change Canada, Detailed categorization results of the Domestic Substances List - Open Government Portal, <https://open.canada.ca/data/en/dataset/1d946396-cf9a-4fa1-8942-4541063bfba4>, (accessed March 7, 2025).
- 5 Health Canada, Chemical substances glossary, <https://www.canada.ca/en/health-canada/services/chemical-substances/chemical-substances-glossary.html>, (accessed March 7, 2025).

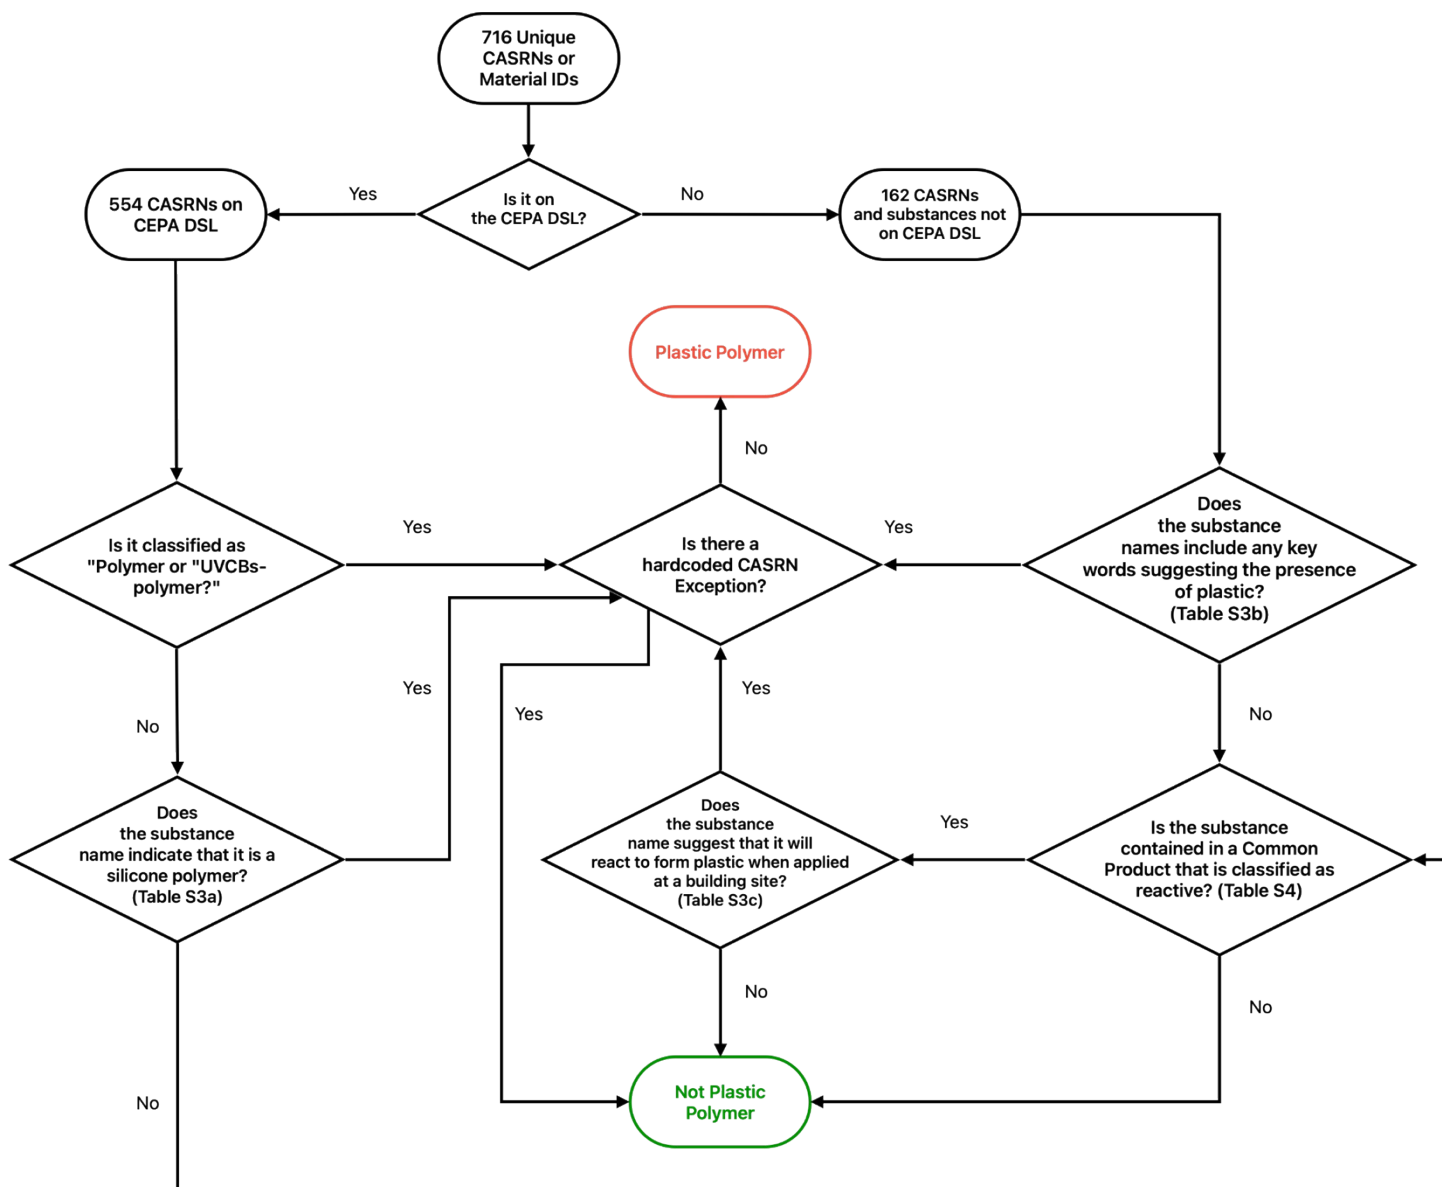

Figure S1. Plastic Polymer Assignment Decision Tree

**Table S3a. Regular expressions used to screen substances on the Canadian Environmental Protection Act 1999 (CEPA) Domestic Substances List (DSL) for silicone chemistry.**

| Search Term | Notes       |
|-------------|-------------|
| silicone    | silicone    |
| dimethicone | dimethicone |

**Table S3b. Regular expressions used to screen all products for keywords suggesting polymer chemistry, including those not found on the CEPA DSL.**

| Search Term                                                    | Notes                                                                                                         |
|----------------------------------------------------------------|---------------------------------------------------------------------------------------------------------------|
| poly(?:chlorinated\s?biphenyl cyclic\s?aromatic\s?hydrocarbon) | captures anything containing 'poly', excluding polychlorinated biphenyls and polycyclic aromatic hydrocarbons |
| resin                                                          | captures anything containing 'resin'                                                                          |
| (?<!natural\s)rubber                                           | rubber, excluding 'natural rubber'                                                                            |
| silicone                                                       | silicone                                                                                                      |
| nylon                                                          | nylon                                                                                                         |
| epoxy                                                          | epoxy                                                                                                         |
| (\sabs\s)                                                      | Acrylonitrile butadiene styrene                                                                               |
| elastomer                                                      | elastomer                                                                                                     |
| dimethicone                                                    | dimethicone                                                                                                   |

**Table S3c. Regular expressions used to screen reactive products for precursors to polymers.**

| Search Terms     | Notes                                                                            |
|------------------|----------------------------------------------------------------------------------|
| diisoc           | Flag isocyanates that are common precursors to polyurethanes                     |
| isocya           | Flag isocyanates that are common precursors to polyurethanes                     |
| bisphenol        | Flag bisphenols, common in epoxy chemistry                                       |
| glycidyl\s?ether | Flag glycidyl ethers, which react to form epoxies, polyurethanes, and polyesters |
| acryl            | Captures precursors to acrylic polymers                                          |

All searches listed in Tables S3a-c above were conducted in R Version 4.5.0 using the `str_detect()` function from the `stringr` library, and were case-insensitive. Search terms are conservative. They are intentionally simple and were designed to err on the side of missing plastic content to avoid identifying non-plastic content as plastic.

**Table S4. Reactive Product Designations for All Common Products.**

| <b>Common Product</b>                                                 | <b>Reactive?</b> |
|-----------------------------------------------------------------------|------------------|
| Drywall Joint Compound                                                | FALSE            |
| Water-based Penetrating Concrete Sealer                               | TRUE             |
| Liquid-applied Moisture Barrier                                       | TRUE             |
| Concrete Cork Expansion Joint                                         | FALSE            |
| Acrylic Firestop Joint Spray                                          | FALSE            |
| XPS Insulation (extruded polystyrene)                                 | FALSE            |
| Trivalent Chromate Pretreatment                                       | FALSE            |
| Aluminum Primer                                                       | TRUE             |
| Elastic Facade Joint Sealant                                          | TRUE             |
| Heterogeneous Vinyl Resilient Sheet Flooring                          | FALSE            |
| Quartz Countertops                                                    | FALSE            |
| Low VOC Flat Acrylic Ceiling Paint                                    | FALSE            |
| IGU Silicone Sealant                                                  | TRUE             |
| Curtain Wall Seals - Rubber (Ethylene Propylene Diene Monomer) Gasket | FALSE            |
| Reinforced EPDM Roofing Membrane                                      | FALSE            |
| Drywall Screws                                                        | FALSE            |
| Low VOC Eggshell Acrylic Paint                                        | FALSE            |
| Drywall Joint Tape                                                    | FALSE            |
| Drywall Acoustical Sealant                                            | FALSE            |
| Pipe Thread Sealant                                                   | FALSE            |
| Solvent Weld Soil and Waste Pipe                                      | FALSE            |
| HDPE Water Pipe                                                       | FALSE            |
| Type X Drywall                                                        | FALSE            |
| Drywall (FGD)                                                         | FALSE            |
| Welded Wire Mesh Concrete Reinforcement                               | FALSE            |
| Foundation Waterproofing Sheet Primer                                 | FALSE            |
| Solvent-Based Asphalt Dampproofing                                    | TRUE             |
| Plywood                                                               | FALSE            |
| Particleboard                                                         | FALSE            |
| Wood Framing                                                          | FALSE            |
| Fire Retardant Lumber                                                 | FALSE            |
| EPS Insulation (expanded polystyrene)                                 | FALSE            |
| Solvent-based Single-ply Roofing Membrane Adhesive                    | FALSE            |
| Medium Density Fiberboard (MDF)                                       | FALSE            |
| High Performance Coatings (Acrylic)                                   | FALSE            |
| Acrylic Flooring Adhesive                                             | FALSE            |
| Polyurethane Flooring Adhesive                                        | TRUE             |

|                                                      |       |
|------------------------------------------------------|-------|
| Vinyl Composition Tile                               | FALSE |
| Hardwood Flooring (prefinished)                      | FALSE |
| Bamboo Flooring (engineered)                         | FALSE |
| Cross Laminated Timber (CLT)                         | FALSE |
| Polypropylene Water Pipe                             | FALSE |
| PEX Water Pipe                                       | FALSE |
| Polyethylene Pipe Insulation                         | FALSE |
| Pipe Insulation Adhesives                            | FALSE |
| Glulam                                               | FALSE |
| Gypsum Spray Fireproofing                            | TRUE  |
| Laminated Glass                                      | FALSE |
| Fiberglass Duct Board Insulation                     | FALSE |
| Solid Surface Countertop                             | FALSE |
| Polyester Powder Coating                             | TRUE  |
| Oriented Strand Board                                | FALSE |
| Vinyl Wall Base                                      | FALSE |
| Horizontal Louver Blinds (PVC) Slats                 | FALSE |
| Orange Peel Texture                                  | FALSE |
| Unfaced Fiberglass Batt Insulation                   | FALSE |
| Base Cabinetry                                       | FALSE |
| Ready Mixed Concrete (Structural, NWC 3000-4000 psi) | TRUE  |
| Sub-Floor Smoothing Compound                         | TRUE  |
| Cementitious Grouting                                | TRUE  |
| Double Pane IGU                                      | FALSE |
| Ready Mixed Concrete (Structural, LWC 3000-4000 psi) | TRUE  |
| Mineral Fiber Batt Insulation                        | FALSE |
| Acrylic Intumescent Firestop Sealant                 | FALSE |
| Vinyl-Faced Gypsum Acoustical Ceiling Panels         | FALSE |
| Mineral Fiber Acoustical Ceiling Panels              | FALSE |
| Expanded Cork Board Insulation                       | FALSE |
| Wet-Blown Cellulose Insulation                       | FALSE |
| Fiber-reinforced Water-based HVAC Duct Sealant       | FALSE |
| Blown-in Cellulose Insulation                        | FALSE |
| Homogenous Virgin Rubber Flooring                    | FALSE |
| Natural Stone Countertop Sealer                      | TRUE  |
| Waterborne Flooring Finish                           | FALSE |
| Unbonded Blown-in Fiberglass Insulation              | FALSE |
| Closed Cell Elastomeric Foam Pipe Insulation         | FALSE |
| Unfaced Cellulose/Cotton Batt Insulation             | FALSE |

|                                                                |       |
|----------------------------------------------------------------|-------|
| Single Component Spray Polyurethane Foam                       | TRUE  |
| Fireblock Single Component Spray Polyurethane Foam             | TRUE  |
| Fiberglass Pipe Insulation                                     | FALSE |
| Non-Combustible Sodium Silicate Caulk                          | TRUE  |
| Acrylic Latex Sealant                                          | FALSE |
| Siliconized Latex Sealant                                      | TRUE  |
| One-Component Silicone Sealant                                 | TRUE  |
| Single-Component Polyurethane Sealant                          | TRUE  |
| Spray-applied Fiberglass Insulation                            | FALSE |
| Mineral Wool Board Insulation                                  | FALSE |
| Foil-backed Butyl Tape                                         | FALSE |
| Silyl-terminated Polyether Sealant                             | TRUE  |
| FSK-faced Fiberglass Duct Wrap                                 | FALSE |
| High Density Fiberboard (HDF)                                  | FALSE |
| Hollow Core Wood Veneer Door                                   | FALSE |
| Solvent-based Butyl Sealant                                    | FALSE |
| Polyvinyl Acetate (PVA) Interior Wood Glue                     | TRUE  |
| ASJ-Faced Fiberglass Board Insulation                          | FALSE |
| Wood Fiber Insulation Boards                                   | FALSE |
| Mineral Silicate Paint                                         | TRUE  |
| Mold and Moisture Resistant Drywall                            | FALSE |
| Tire-derived Crumb Rubber                                      | FALSE |
| EPDM Infill for Synthetic Turf                                 | FALSE |
| Thermoplastic Elastomer (TPE) Infill for Synthetic Turf        | FALSE |
| Solvent-based HVAC Duct Sealant                                | FALSE |
| Water-based Penetrating Grout Sealer (Water Repelling)         | TRUE  |
| Water-based Penetrating Grout Sealer (Water and Oil Repelling) | TRUE  |
| Polymer-modified Cementitious Tile Grout                       | TRUE  |
| Latex-Portland Cement Mortar (Thinset)                         | TRUE  |
| Water-based Stain-blocking Primer/Sealer                       | FALSE |
| Post-Consumer Wood Fiber (OSB, Plywood, and Pallet Waste)      | FALSE |
| Post-consumer Flexible PVC (Multiple Streams)                  | FALSE |
| Post-Consumer Paperboard                                       | FALSE |
| Post-consumer Nylon 6 and 6,6                                  | FALSE |
| Post-Consumer Newsprint                                        | FALSE |
| Chlorinated Polyvinyl Chloride (CPVC) Water Pipe               | FALSE |
| Polyvinyl Chloride (PVC) Water Pipe                            | FALSE |
| Cold Applied Emulsified Asphalt Dampproofing                   | TRUE  |
| Inorganic Silicate Concrete Densifier                          | TRUE  |

|                                                                   |       |
|-------------------------------------------------------------------|-------|
| Universal Paint Colorants                                         | FALSE |
| Water-based Paint Colorants                                       | FALSE |
| Crystalline Concrete Waterproofing                                | TRUE  |
| Low-VOC Solvent-based TPO/EPDM Roofing Membrane Adhesive          | FALSE |
| Water-based Single-ply Roofing Membrane Adhesive                  | FALSE |
| Asphalt Primer for Built-Up Roofing                               | TRUE  |
| PE-RT Potable Water Pipe                                          | FALSE |
| Solventborne alkyd primer                                         | TRUE  |
| Water-based Acrylic Concrete Dye                                  | FALSE |
| Waterborne alkyd primer                                           | TRUE  |
| High-Solids Silicone Roof Coating                                 | TRUE  |
| Single-Component Polyurethane Fluid-Applied Waterproofing         | TRUE  |
| Single-component Silicone Structural Glazing Sealant              | TRUE  |
| Single-component Silicone Weather Sealant                         | TRUE  |
| Mildew-resistant Acetoxy-cure Silicone Sealant                    | TRUE  |
| Silicone Firestop Joint Spray                                     | TRUE  |
| Silicone Firestop Sealant                                         | TRUE  |
| Firestop Putty                                                    | FALSE |
| Firestop Mortar                                                   | TRUE  |
| Acrylic Firestop Sealant                                          | FALSE |
| Water-reducing High Range Concrete Admixtures (Superplasticizers) | FALSE |
| Air Entraining Concrete Admixture                                 | FALSE |
| One-Part Expanding Firestop Spray Foam                            | TRUE  |
| Open Cell Backer Rod                                              | FALSE |
| Nail Laminated Timber                                             | FALSE |
| Supplementary Cementitious Materials                              | TRUE  |
| Waterborne Penetrating Wood Sealer                                | TRUE  |
| STPE Fluid-Applied Weather Barrier                                | TRUE  |
| Cementitious Fireproofing (Medium Density 22-30 pcf)              | TRUE  |
| CPVC Solvent Cement                                               | FALSE |
| PVC and CPVC Pipe Primer                                          | FALSE |
| Oil-Based Penetrating Wood Sealer                                 | TRUE  |
| Solvent-Based Thin Film Intumescent Coating                       | FALSE |
| Water Based Thin Film Intumescent Coating                         | FALSE |
| Universal Metal Primer                                            | TRUE  |
| Water-Based Dissipating Resin Concrete Curing Compound            | FALSE |
| Wood Fiber Acoustical Panels                                      | FALSE |
| Fiberglass Window Frame                                           | FALSE |
| Rigid PVC Window Profile                                          | FALSE |

|                                                            |       |
|------------------------------------------------------------|-------|
| Sheep's Wool Felt                                          | FALSE |
| Plastic Acoustical Panels                                  | FALSE |
| Lime Plaster                                               | TRUE  |
| Gypsum Veneer Plastering                                   | TRUE  |
| Acrylic Plaster                                            | FALSE |
| Natural Clay Plastering                                    | FALSE |
| Glass Mat-Faced Interior Gypsum Board                      | FALSE |
| Magnesium Oxide Board                                      | FALSE |
| Composite Window Frame                                     | FALSE |
| Fiber Cement Siding/Cladding                               | FALSE |
| Vinyl Siding                                               | FALSE |
| Brick Siding                                               | FALSE |
| Solid Wood Siding                                          | FALSE |
| Luxury Vinyl Tile (LVT)                                    | FALSE |
| Linoleum Flooring                                          | FALSE |
| Rebar (40,60,75,80 Grade Steel)                            | FALSE |
| Hydrophilic Concrete Joint Waterstop                       | FALSE |
| Vapor Barrier                                              | FALSE |
| Structural Steel (I-beams)                                 | FALSE |
| Composite Metal Decking                                    | FALSE |
| Pre-compressed Polyurethane Joint Seal                     | FALSE |
| Anodized Aluminum Curtainwall Extrusion                    | FALSE |
| Vinyl-Coated Wire Shelving                                 | FALSE |
| High Pressure Laminate                                     | FALSE |
| Gelcoat Fiberglass Bathware                                | FALSE |
| Hot-Applied Asphalt Waterproofing/Roofing                  | TRUE  |
| Acoustical Metal Ceiling Tiles                             | FALSE |
| Steel Studs                                                | FALSE |
| Steel Pipe Hanger                                          | FALSE |
| Copper Water Pipe                                          | FALSE |
| Galvanized Steel Ducts                                     | FALSE |
| Carbon Steel Sprinkler Pipe                                | FALSE |
| Steel Conduit                                              | FALSE |
| Foundation Waterproofing Sheet Membrane                    | TRUE  |
| Closed Cell Spray Foam Insulation                          | TRUE  |
| Reinforced Thermoplastic Polyolefin (TPO) Roofing Membrane | FALSE |
| PVDF-Coated Aluminum Curtainwall Extrusion                 | FALSE |
| High Performance Coating (Epoxy)                           | TRUE  |
| Epoxy Flooring Adhesive                                    | TRUE  |

|                                                                       |       |
|-----------------------------------------------------------------------|-------|
| Carpet Tile w/Nylon 6 Fiber, Polyolefin Backing, and Limestone Filler | FALSE |
| Polycarbonate Cladding                                                | FALSE |
| Structural Steel Cables                                               | FALSE |
| Cast Iron Pipes                                                       | FALSE |
| Reinforced PVC Roofing Membrane                                       | FALSE |
| Steel Door                                                            | FALSE |
| Fluid-Applied Flooring                                                | TRUE  |
| Steel Bolt Assembly (General Use)                                     | FALSE |
| Steel Bolt Assembly (Structural)                                      | FALSE |
| Cultured Marble Surfaces                                              | FALSE |
| Kraft-faced Fiberglass Batt Insulation                                | FALSE |
| Concrete Masonry Unit                                                 | FALSE |
| Glass Fiber Reinforced Polymer Decking                                | FALSE |
| Glass Fiber Reinforced Polymer Water Storage Tank                     | FALSE |
| Granular Fill                                                         | FALSE |
| Polyisocyanurate Wall Insulation Board                                | FALSE |
| Broadloom Carpet (Nylon Facing, SBR Latex Backing)                    | FALSE |
| Exterior Door w/IGU                                                   | FALSE |
| PVC-free Resilient Flooring (Homogeneous)                             | FALSE |
| Multilayer Resilient Flooring (WPC)                                   | FALSE |
| Cork Flooring (Floating Floor)                                        | FALSE |
| Cork Flooring (Glue-down)                                             | FALSE |
| Cementitious Backerboard                                              | FALSE |
| Peel and Stick Flooring Adhesive                                      | FALSE |
| Ceramic Tile                                                          | FALSE |
| PVC-free Resilient Flooring (Heterogeneous)                           | FALSE |
| Cold fluid-applied PMMA waterproofing                                 | TRUE  |
| Bentonite Sheet Waterproofing                                         | FALSE |
| Modified Bituminous SBS Membrane Roofing                              | FALSE |
| Spray Polyurethane Foam (SPF) Roofing                                 | TRUE  |
| Torch Applied APP Bitumen Roofing                                     | TRUE  |
| Two-Component Polyurethane Sealant                                    | TRUE  |
| Firestop Pillow                                                       | FALSE |
| Dowel Laminated Timber                                                | FALSE |
| Epoxy Thin-Film Intumescent Coating                                   | TRUE  |
| Fully-Bonded Pre-Applied Waterproofing Membrane                       | TRUE  |
| Portland Cement Terrazzo Flooring                                     | TRUE  |
| Biobased Fluid-Applied Resilient Flooring                             | TRUE  |
| Fiberglass Acoustical Ceiling Panel                                   | FALSE |

|                                                                        |       |
|------------------------------------------------------------------------|-------|
| PET Acoustical Panels                                                  | FALSE |
| Aluminum Window Frame                                                  | FALSE |
| Stretched-Fabric Acoustical Systems (PVC-Free)                         | FALSE |
| Composite Wood Acoustical Panels                                       | FALSE |
| Fabric-wrapped Acoustical Wall Panels                                  | FALSE |
| Portland Cement Plastering                                             | TRUE  |
| Gypsum Plaster                                                         | TRUE  |
| Acoustical Plastering System                                           | TRUE  |
| Gypsum Veneer Base                                                     | FALSE |
| PVDF-Coated Aluminum Cladding                                          | FALSE |
| Roof Edge Flashing                                                     | FALSE |
| Synthetic Turf (Tufted Polyolefin Backing, Crumb Rubber + Sand Infill) | FALSE |
| Synthetic Turf (Tufted Polyolefin Backing, EPDM + Sand Infill)         | FALSE |
| Synthetic Turf (Tufted Polyolefin Backing, TPE + Sand Infill)          | FALSE |

Products are flagged as reactive if they were determined to contain chemicals that chemically react with other reactants in the product, with gases in air, or with added water.

**Table S5. Regular expressions used to identify plastic polymer types.**

| Plastic Polymer Type | Search Terms                                       | Notes                                                                                                                                                                               |
|----------------------|----------------------------------------------------|-------------------------------------------------------------------------------------------------------------------------------------------------------------------------------------|
| Polyethylene         | (?<!chlorinated\\s?)polyethylene<br>(?!\\s?glycol) | Negative lookbehind prevents chlorinated polyethylene from being classified as polyethylene; negative lookahead prevents polyethylene glycol from being classified as polyethylene. |
| PVC-related polymers | vinyl\\schloride                                   |                                                                                                                                                                                     |
| SBR                  | Styrene Butadiene Rubber                           |                                                                                                                                                                                     |
| SBR                  | SBR                                                |                                                                                                                                                                                     |
| Formaldehyde-based   | formaldehyde                                       |                                                                                                                                                                                     |
| Polystyrene          | polystyrene                                        |                                                                                                                                                                                     |
| Polypropylene        | polypropylene(?!\\s?glycol)                        |                                                                                                                                                                                     |
| PET/Polyester        | polyethylene<br>terephthalate   PET[g]?\$          | Polyethylene terephthalate glycol is classified as PET/Polyester to limit the number of categories since it only occurred in one product.                                           |
| Urethane Acrylic     | urethane acrylic                                   |                                                                                                                                                                                     |
| Acrylic              | (?<!urethane.)acryl                                | Negative lookbehind prevents urethane acrylic polymers from being classified as acrylic polymers,                                                                                   |
| PU                   | urethane(?!.acryl)                                 | Negative lookahead prevents urethane acrylic polymers from being classified as polyurethane.                                                                                        |
| EVA                  | Ethylenevinylacetate                               |                                                                                                                                                                                     |
| Polyvinyl Acetate    | polyvinyl acetate                                  |                                                                                                                                                                                     |
| Acrylic              | 2-Propenoic acid                                   |                                                                                                                                                                                     |
| PU                   | (?<!triglycidyl\\s?)(diisoc   isocya)              |                                                                                                                                                                                     |
| Epoxy                | bisphenol                                          |                                                                                                                                                                                     |
| Epoxy                | epoxy                                              |                                                                                                                                                                                     |
| PU                   | polyurethane                                       |                                                                                                                                                                                     |
| Polyvinyl Alcohol    | polyvinyl alcohol                                  |                                                                                                                                                                                     |
| Polycarbonate        | polycarbonate                                      |                                                                                                                                                                                     |
| Nylon                | (?=.*capram) (?=.*capro)                           |                                                                                                                                                                                     |
| PET/Polyester        | polyester                                          |                                                                                                                                                                                     |
| Silicone             | dimethicone                                        |                                                                                                                                                                                     |
| Silicone             | silicone   (poly.*siloxane)                        |                                                                                                                                                                                     |
| Polychloroprene      | polychloroprene                                    |                                                                                                                                                                                     |
| Fluorinated Polymers | fluor(?!.*salt)                                    | Flags fluoropolymers and uses a negative lookahead to prevent salts from being classified as fluoropolymers.                                                                        |

All searches were conducted in R Version 4.5.0 using the `str_detect()` function from the `stringr` library, and were case-insensitive. Any additional plastic types reported in Table S1 that are not shown in Table S5 were initially flagged as “Other” and manually assigned a plastic type.
